# Supplementary material for: Comprehensive Analysis of the SUL1 Promoter of Saccharomyces cerevisiae
Source: Oxford University Press journal article supplement (doi:10.1534/genetics.116.188037), 2016-03-03
Supplement: figures1.pdf [file figures1.pdf]

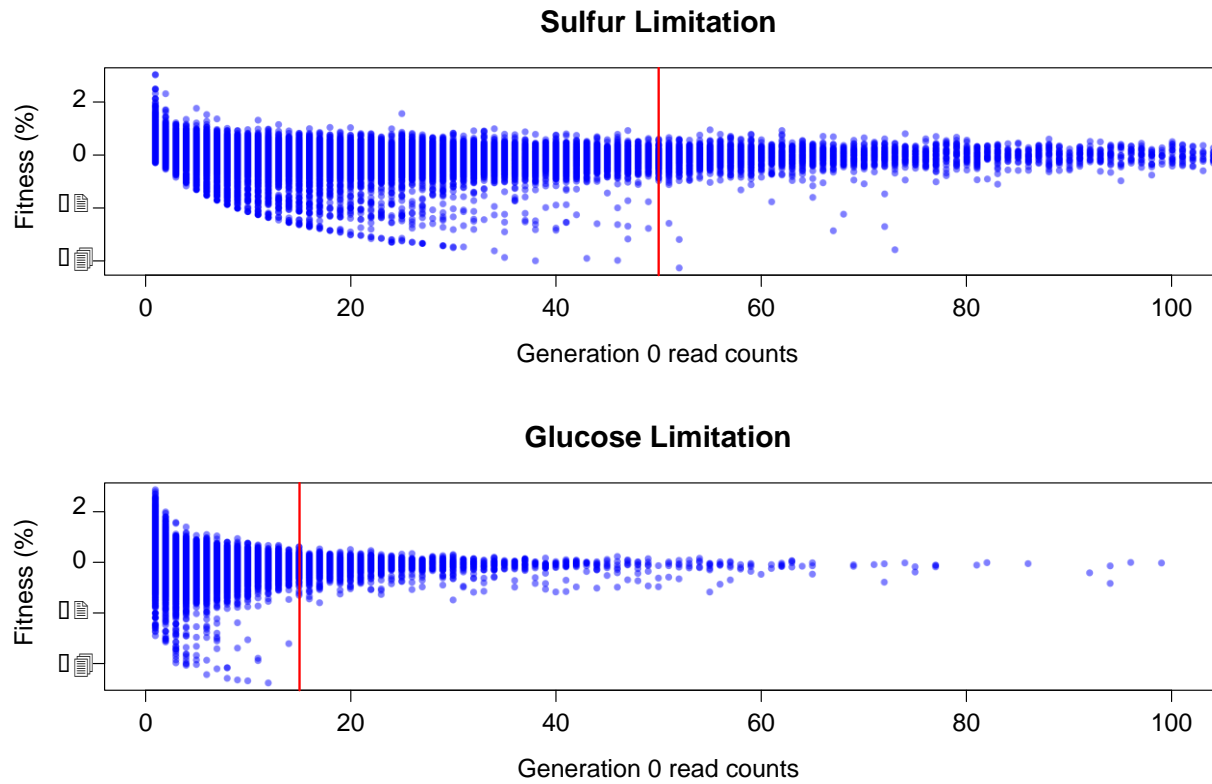

**Figure S1** Determining minimum read count threshold for variant filtration. Barcodes linked to wildtype *SUL1* promoters were used to set a minimum generation 0 read count for variant filtration. The fitness of each wildtype barcode is plotted against that barcode's generation 0 read count. Filtration thresholds (red lines) were set at a point where the dependency between read count and barcode fitness was not apparent.
