# Supplementary material for: Comprehensive Analysis of the SUL1 Promoter of Saccharomyces cerevisiae
Source: Oxford University Press journal article supplement (doi:10.1534/genetics.116.188037), 2016-03-03
Supplement: figures3.pdf [file figures3.pdf]

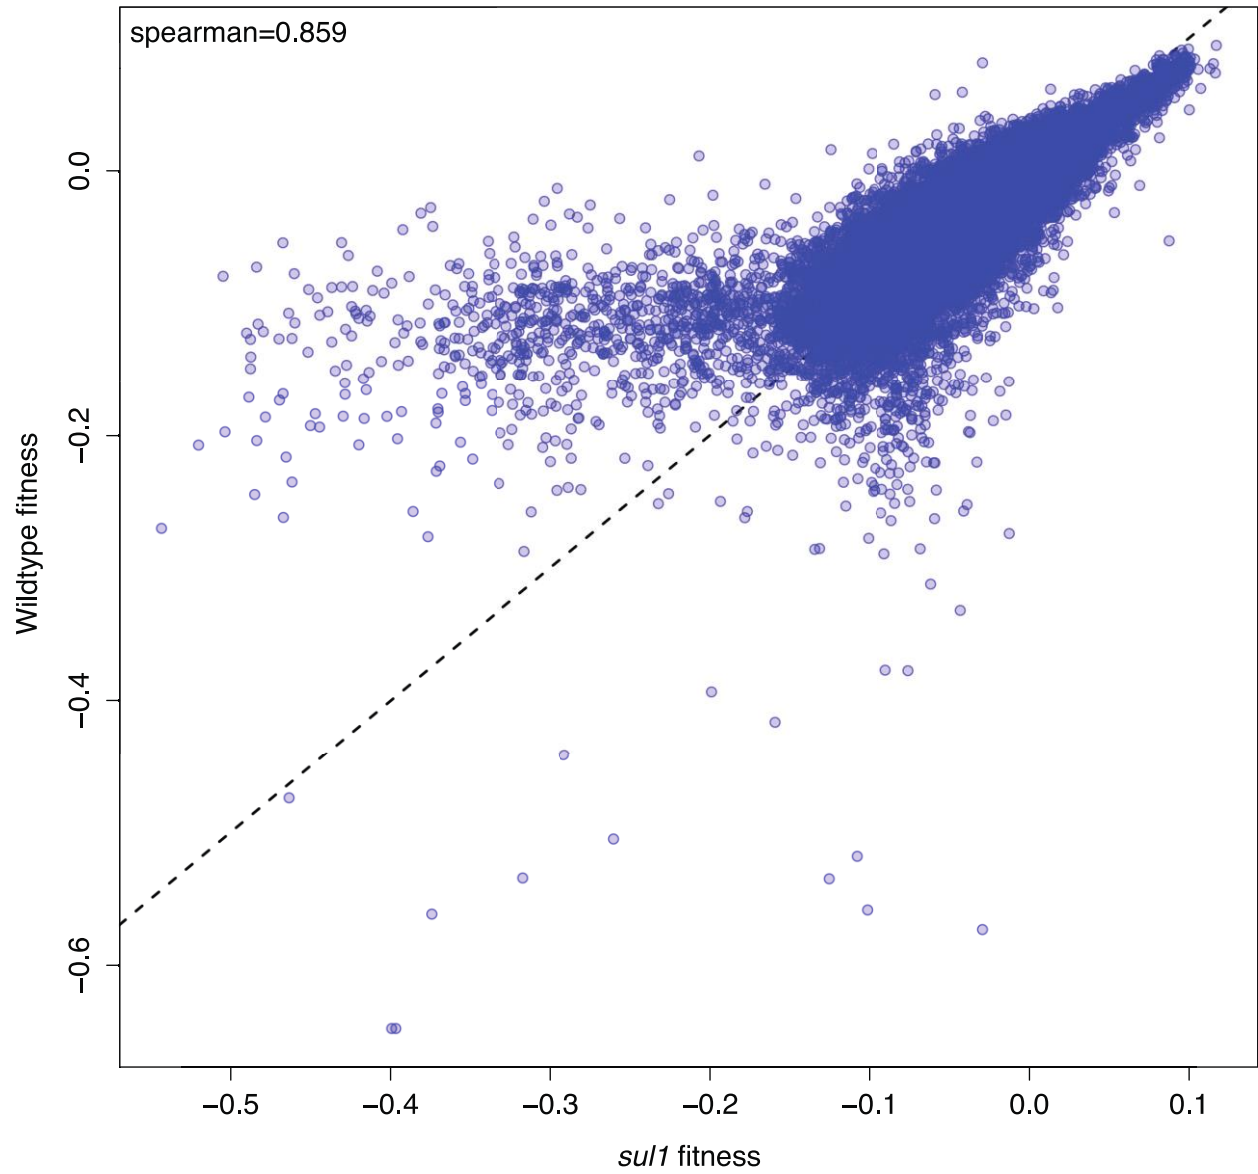

**Figure S3** Correlation between fitness changes of variants in FY3 and FY3*sul1* $\Delta$ . Only variants passing filtration in both datasets (n=29,763) are shown. The dashed line shows  $y=x$ .
