# Supplementary material for: Comprehensive Analysis of the SUL1 Promoter of Saccharomyces cerevisiae
Source: Oxford University Press journal article supplement (doi:10.1534/genetics.116.188037), 2016-03-03
Supplement: figures6.pdf [file figures6.pdf]

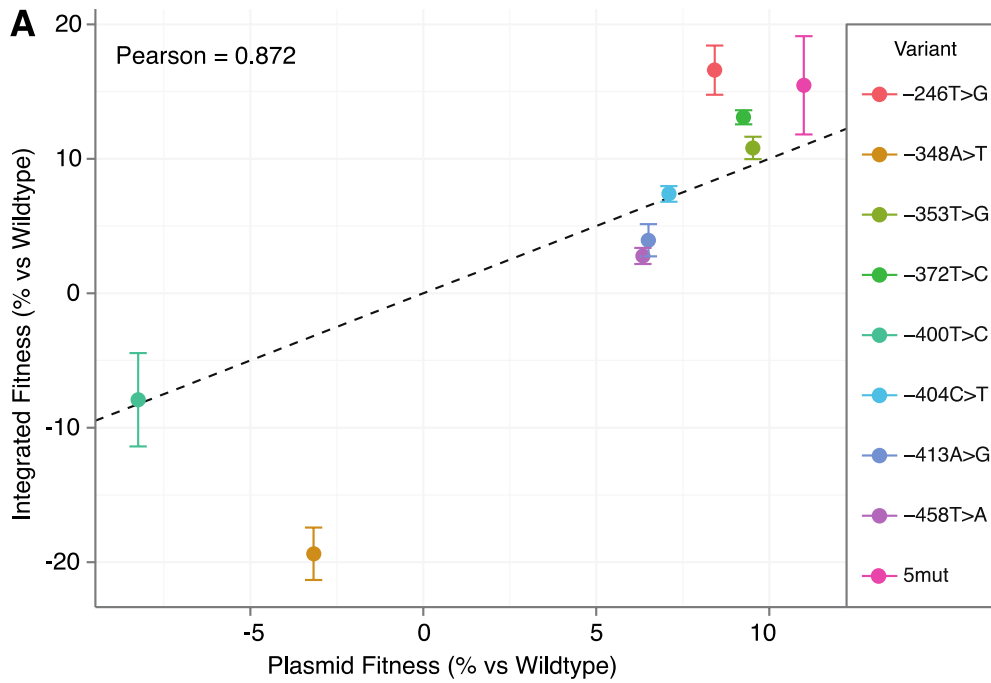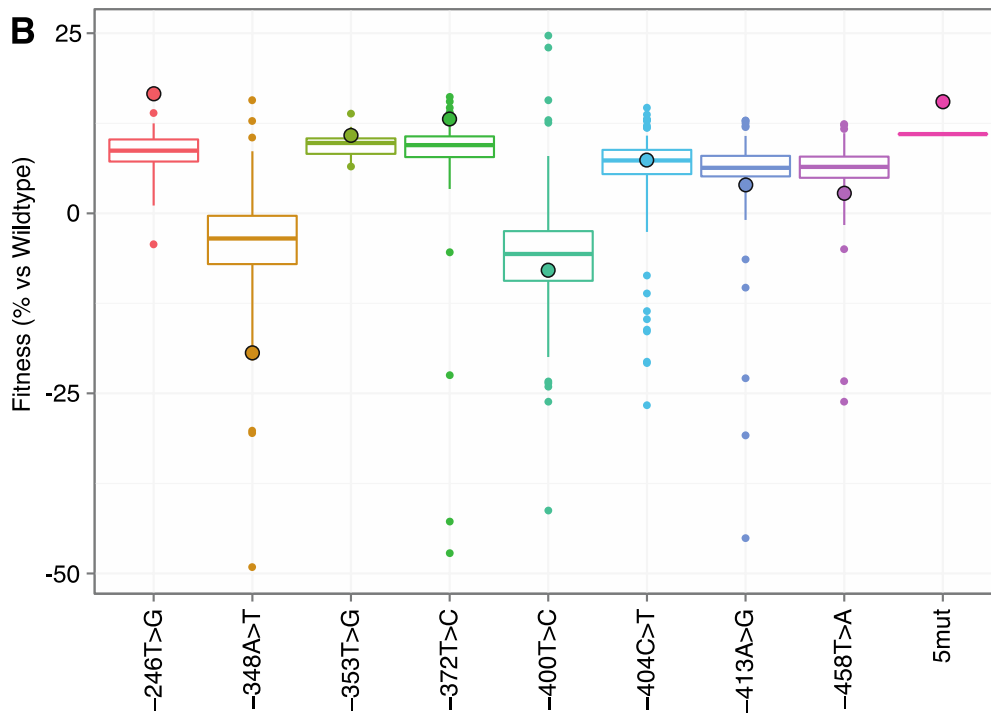

**Figure S6** Correlation of fitness measurements between pooled plasmid assays and genomic Integrations. (A) Scatterplot showing fitness measurements for strains based either on a pooled assay in which promoter variants are found on centromeric plasmids (x-axis) or individual measurements in which promoter variants were integrated scarlessly at the *SUL1* promoter (y-axis). Error bars represent standard deviations ( $n=2$ ). The dashed line shows  $y=x$ . (B) Boxplots showing the distribution of fitness values amongst redundantly barcoded variants tested in (A). Whiskers for boxplots span 95% of the total distribution. Larger outlined points mark the fitness change of strains where each variant has been integrated at the *SUL1* promoter. In both panels, fitness measurements are normalized to the wildtype fitness. The variant “5mut” comprises five mutations: -353T>G, -372T>C, -404C>T, -413A>G, and -458T>A.
