# Supplementary figures and images for: Comprehensive Analysis of the SUL1 Promoter of Saccharomyces cerevisiae
Source: Oxford University Press journal article supplement (doi:10.1534/genetics.116.188037), 2016-03-03

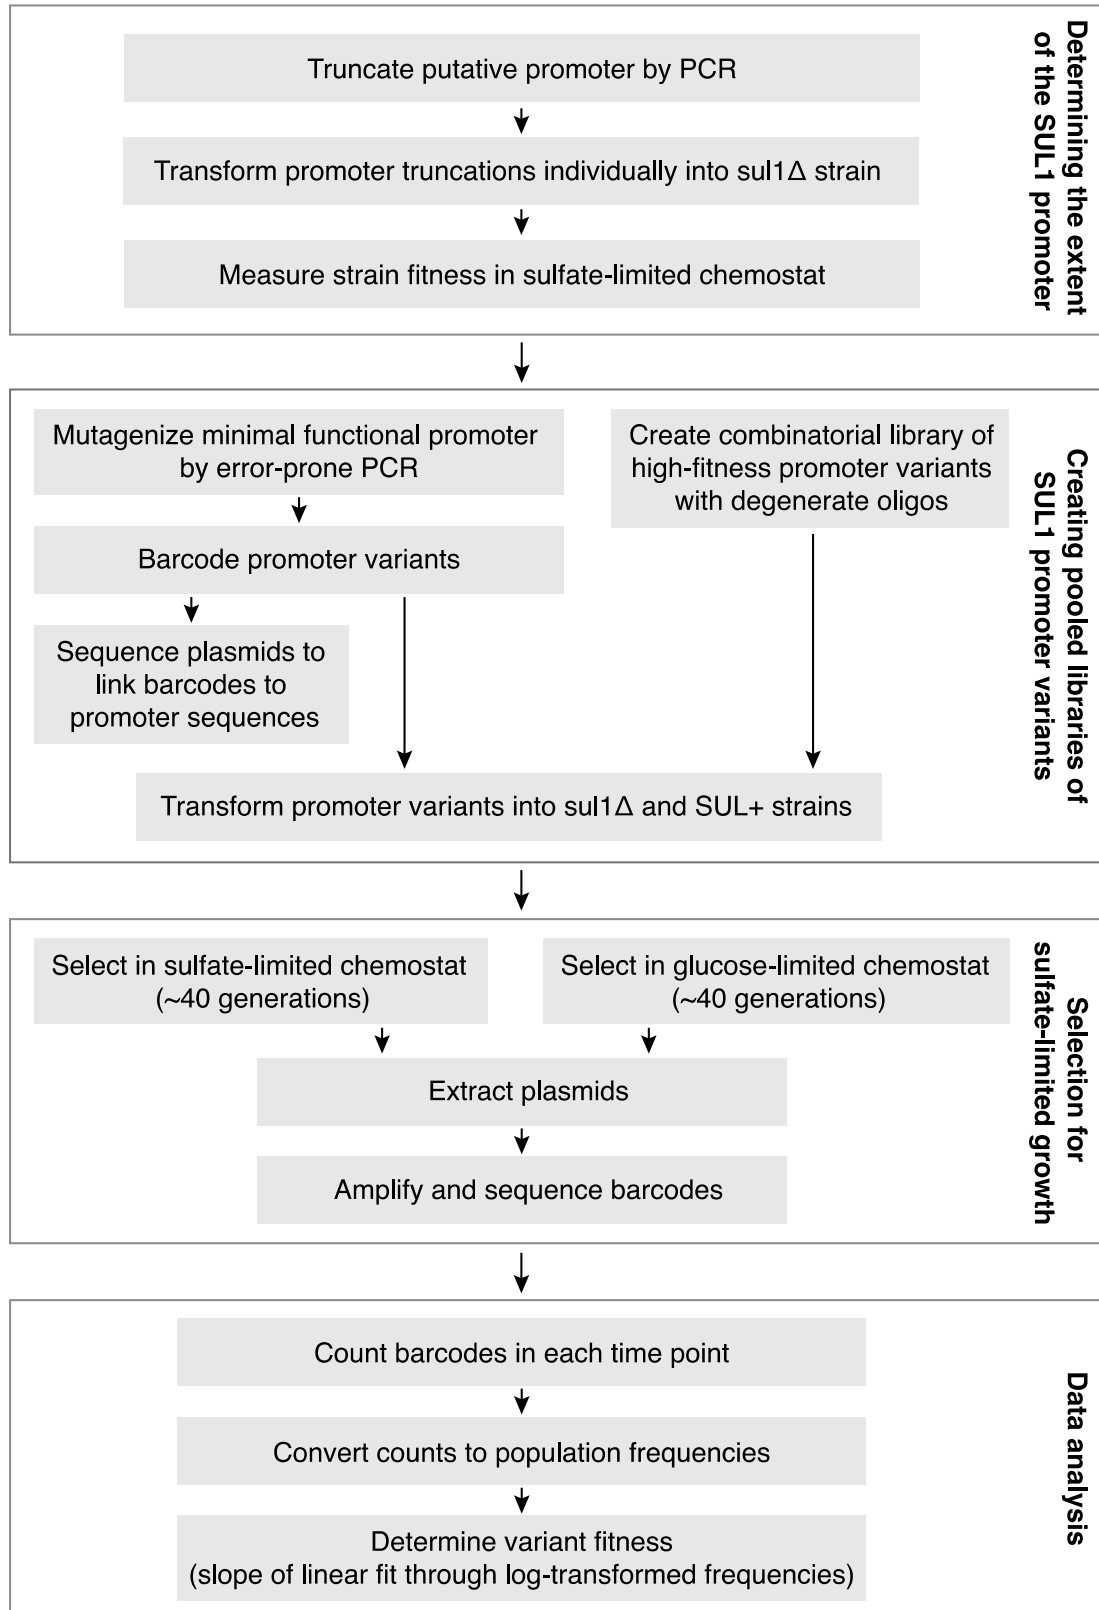

**Figure S7** Flow-chart of experiments presented in this study

Supplement: figures7.pdf [file figures7.pdf]
